# Supplementary material for: Effects of school breaks on influenza-like illness incidence in a temperate Chinese region: an ecological study from 2008 to 2015
Source: PubMed Central journal article supplement — BMJ Open. 2017 Mar 6;7(3):e013159. doi: 10.1136/bmjopen-2016-013159 (PMC5353286; doi:10.1136/bmjopen-2016-013159), 2017-03-06

## Technical Appendix

### 1. Poisson regression model

The following Poisson model was used to fit weekly influenza-like illness (ILI) for each age group separately:

$$\begin{cases} ILI_t \sim \text{Poisson}(\mu_t), \\ \ln(\mu_t) = \ln(Pt_t) + \beta_0 + \beta_1 Y_t + \beta_2 W_t + \beta_3 \sin\left(\frac{2\pi t}{52}\right) + \beta_4 \cos\left(\frac{2\pi t}{52}\right) + \beta_5 \sin\left(\frac{4\pi t}{52}\right) + \beta_6 \cos\left(\frac{4\pi t}{52}\right) + \varepsilon_t. \end{cases}$$

where  $\varepsilon_t = \phi\varepsilon_{t-1} + \delta_t$ , and  $\delta_t \sim N(0, \tau^2)$ .  $t$  is a sub-index for week number ( $t=1,2,3\dots 416$ ) and  $ILI_t$  is the number of ILI-related medical visits in week  $t$ , which is assumed to follow Poisson distribution.

$\beta_0, \beta_1, \beta_2, \beta_3, \beta_4, \beta_5, \beta_6$  denote intercept and coefficients.  $PT_t$  is the population size of the corresponding age group as reported in the 2010 Chinese Population Census;  $Y_t$  is a vector of dummy variables for each year  $y_{2008}$  (1–52 week),  $y_{2009}$  (53–104 week),  $y_{2010}$  (105–156 week),  $y_{2011}$  (157–208 week),  $y_{2012}$  (209–260 week),  $y_{2013}$  (261–312 week),  $y_{2014}$  (313–364 week),  $y_{2015}$  (365–416 week);  $\sin\left(\frac{2\pi t}{52}\right)$ ,  $\cos\left(\frac{2\pi t}{52}\right)$ ,  $\sin\left(\frac{4\pi t}{52}\right)$ , and  $\cos\left(\frac{4\pi t}{52}\right)$  are sinusoidal terms to account for seasonal patterns in the number of ILI-related visits;  $W_t$  are dummy variables for the two weeks before, the four weeks during and the four weeks after the winter school breaks in each year.

### 2. Bootstrap method to construct 95% confidence intervals for IRRs

We assumed that if there were no school holidays, the ILI occurrences during the holiday weeks would be similar to ILI occurrences  $\pm 4$  weeks surrounding the holiday weeks. Therefore, we randomly chose the ILI data points within the 4-week window 1000 times for each age group and constructed the 95% confidence intervals for ILI incidence rate ratio (IRR) of schoolchildren to adults. We consistently found that the observed IRRs during the school holidays were lower than the bootstrapped confidence intervals.

**Table S1. Descriptions for dummy variables  $W_t$** 

| Notation                              | Description                                                                                                |
|---------------------------------------|------------------------------------------------------------------------------------------------------------|
| $w_1 w_2 w_3 w_4$                     | 1 <sup>st</sup> , 2 <sup>nd</sup> , 3 <sup>rd</sup> , 4 <sup>th</sup> week in winter break                 |
| $wafter_1 wafter_2 wafter_3 wafter_4$ | 1 <sup>st</sup> , 2 <sup>nd</sup> , 3 <sup>rd</sup> , 4 <sup>th</sup> week immediately after winter breaks |
| $wbefore$                             | 1 <sup>st</sup> and 2 <sup>nd</sup> week before winter breaks                                              |
| $other$                               | Other week than weeks mentioned above                                                                      |

**Table S2. Age-specific  $\phi$  fitted by generalized linear model and 95% confidence intervals.**

|         | Age 0–4     | Age 5–14    | Age 15–24   | Age 25–59   | Age $\geq 60$ |
|---------|-------------|-------------|-------------|-------------|---------------|
| $\phi$  | 0.90        | 0.86        | 0.83        | 0.89        | 0.62          |
| (95%CI) | (0.82-0.95) | (0.75-0.91) | (0.75-0.88) | (0.79-0.94) | (0.53-0.70)   |

**Table S3. ILI incidence rate ratios (IRRs) of schoolchildren to adults during four-week periods surrounding winter/summer breaks, by age group, Beijing, 2008–2015.**

| Holiday | Age group | ILI Incidence Rate Ratio(95% CI) |                     |                     | <i>P</i> value*  |                 |
|---------|-----------|----------------------------------|---------------------|---------------------|------------------|-----------------|
|         |           | Before school break              | During school break | After school Break  | Before to During | During to After |
| Winter  | 5–14      |                                  |                     |                     |                  |                 |
|         | 25–59     | 6.81<br>(6.65-6.98)              | 9.95<br>(9.61-10.3) | 14.9<br>(14.3-15.6) | <0.001           | <0.001          |
|         | ≥60       | 8.02<br>(7.51-8.58)              | 9.20<br>(8.67-9.76) | 13.3<br>(12.1-14.7) | <0.001           | <0.001          |
|         | 15–24     |                                  |                     |                     |                  |                 |
|         | 25–59     | 1.12<br>(1.06-1.19)              | 1.03<br>(0.98-1.09) | 1.33<br>(1.22-1.45) | <0.001           | <0.001          |
|         | ≥60       | 1.24<br>(1.14-1.34)              | 0.96<br>(0.89-1.03) | 1.30<br>(1.16-1.47) | <0.001           | <0.001          |
| Summer  | 5–14      |                                  |                     |                     |                  |                 |
|         | 25–59     | 23.5<br>(22.4-24.6)              | 17.0<br>(16.5-17.6) | 21.1<br>(20.1-22.1) | <0.001           | <0.001          |
|         | ≥60       | 19.4<br>(17.4-21.7)              | 14.3<br>(13.6-15.1) | 19.5<br>(17.4-21.9) | <0.001           | <0.001          |
|         | 15–24     |                                  |                     |                     |                  |                 |
|         | 25–59     | 1.63<br>(1.48-1.79)              | 1.41<br>(1.34-1.48) | 1.71<br>(1.56-1.88) | 0.002            | <0.001          |
|         | ≥60       | 1.47<br>(1.29-1.67)              | 1.19<br>(1.11-1.27) | 1.62<br>(1.42-1.85) | 0.018            | <0.001          |

\*Small *P* values indicate that the incidence rate ratio for the period before the break is significantly higher than that for the period during the break (or the incidence rate ratio for the period during the break is significantly higher than that for the period after the break).

**Figure S1. Time series of weekly total outpatient visits in Xicheng District, Beijing China from 2008 to 2015.**

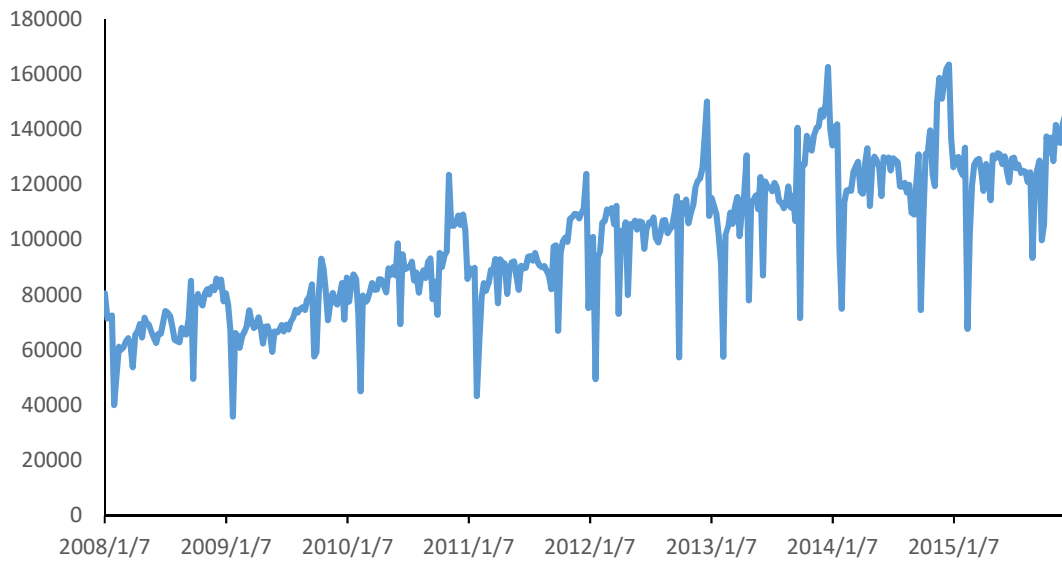

Supplement: bmjopen-2016-013159supp_appendix.pdf [file bmjopen-2016-013159supp_appendix.pdf]
